# Supplementary material
Source: publisher figshare collection journal article supplement (https://acs.figshare.com/ndownloader/files/3996481)
Supplement: Supplementary file 1 [file 3996481]

**Supporting information**

# Local Refractive Index Sensing Based on Edge Gold-Coated Silver Nanoprisms

*Erik Martinsson<sup>†</sup>, Mohammad Mehdi Shahjamali<sup>‡</sup>, Karin Enander<sup>†</sup>, Freddy Boey<sup>‡</sup>, Can Xue<sup>‡</sup>,*

*Daniel Aili<sup>†,\*</sup> and Bo Liedberg<sup>†,§</sup>*

<sup>†</sup> Division of Molecular Physics, Department of Physics, Chemistry and Biology (IFM),

Linköping University, SE-581 83 Linköping, Sweden

<sup>‡</sup> School of Materials Science and Engineering, Nanyang Technological University, Block N4.1,

50 Nanyang Avenue, Singapore 639798

<sup>§</sup> Centre for Biomimetic Sensor Science, Nanyang Technological University, 50 Nanyang Drive,

Research Technoplaza, 6th Storey, XFrontiers Block, Singapore 637553

\* Address correspondence to [daniel.aili@liu.se](mailto:daniel.aili@liu.se)

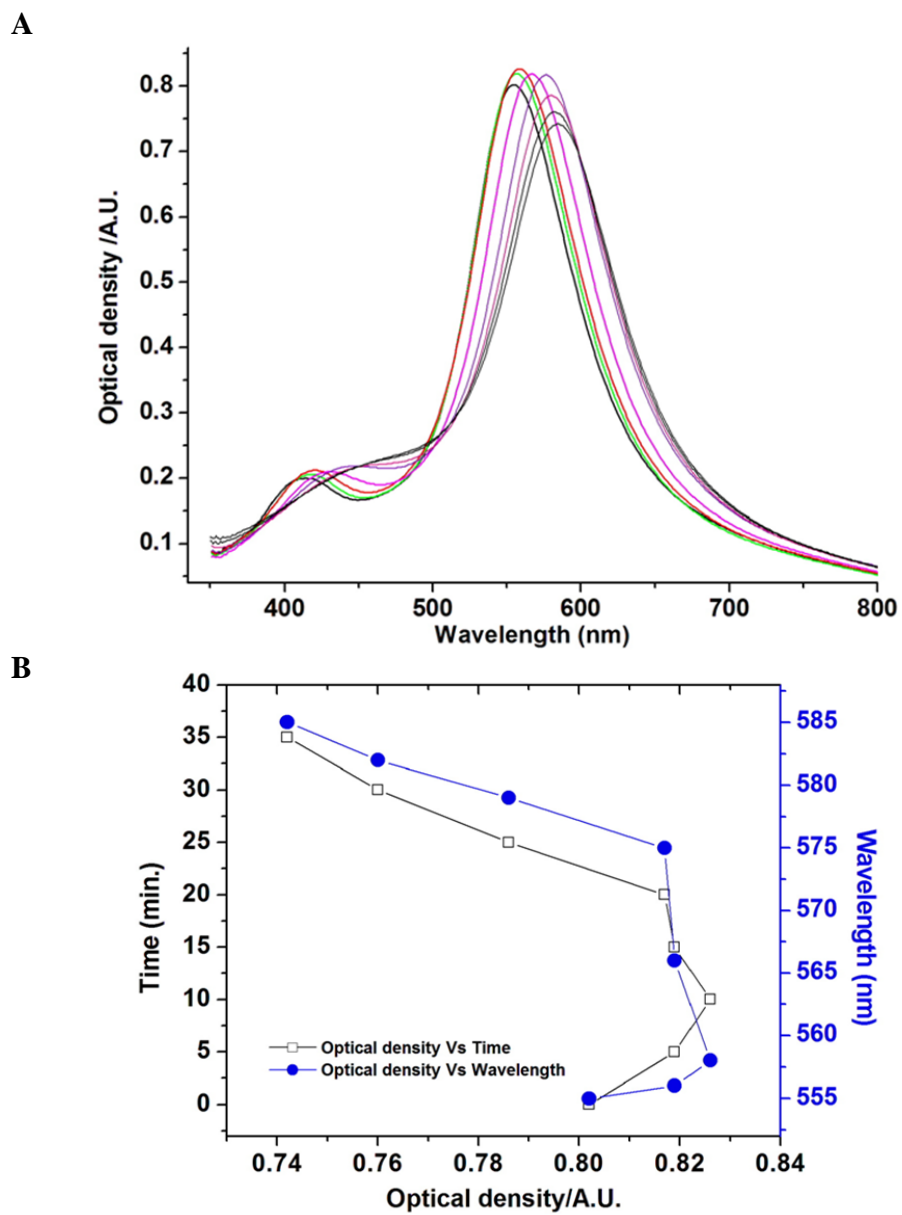

**Figure S1:** A) Typical SPR band evolution during 35 min edge gold-coating. B) Close look of SPR band evolution in A. The SPR band red-shifted ~30 nm after edge-gold coating.

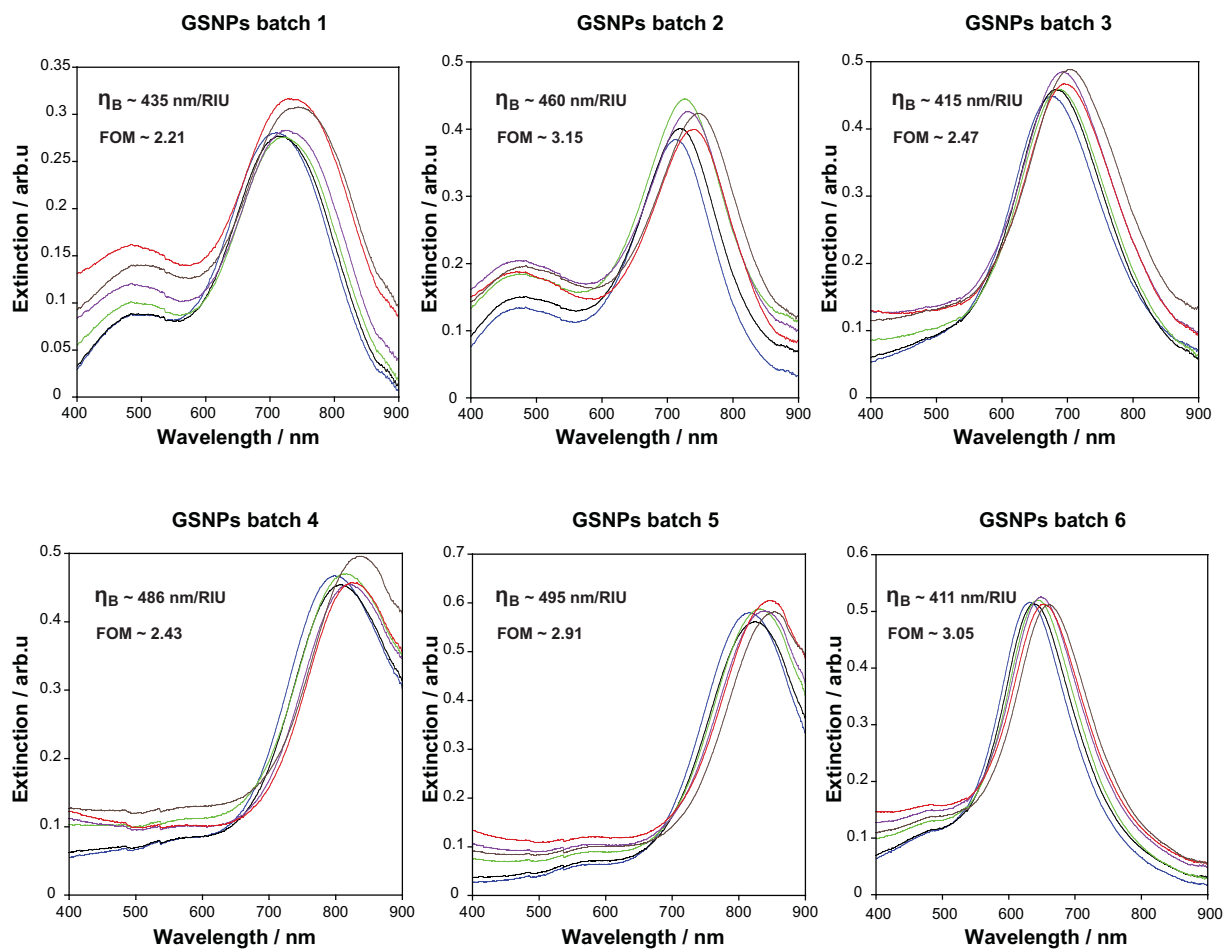

**Figure S2:** UV-VIS spectra for six different batches of dispersed GSNPs in various concentrations of sucrose (0-50%). Bulk RI sensitivities ( $\eta_B$ ) and FOM-values are reported for each batch.

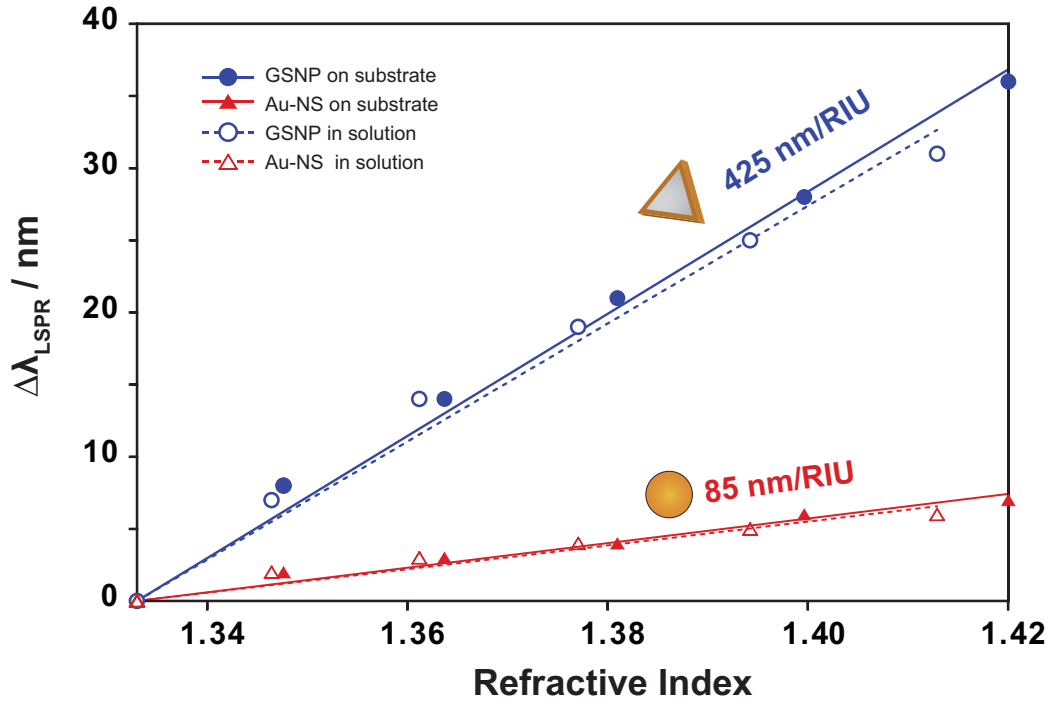

**Figure S3:** Comparison of bulk refractive index sensitivity for GSNPs and gold nanospheres immobilized on a substrate and in solution. No difference in sensitivity can be observed. Bulk refractive index sensitivity for dispersed nanoparticles was determined by mixing 10  $\mu$ l of highly concentrated nanoparticles together with 100  $\mu$ l of various sucrose solutions (0-50%, w/w)

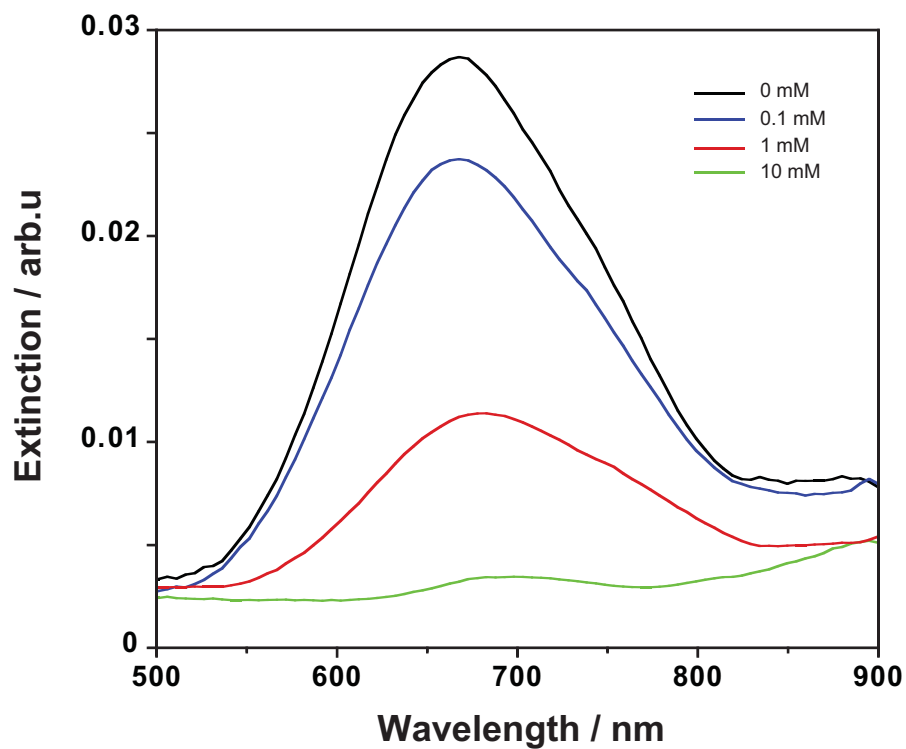

**Figure S4:** UV-VIS spectra of GSNPs exposed to H<sub>2</sub>O<sub>2</sub> at different concentrations. GSNPs were immobilized in a microtiter plate using PEI/PSS/PAH with the protocol described in the methods section. Various concentration of hydrogen peroxide was added to the particles, incubated for 15 min followed by rinsing and finally, extinction spectra were recorded using UV-Vis spectroscopy.
